# Supplementary material
Source: MDPI journal article supplement (https://www.mdpi.com/2311-5637/9/2/93)
Supplement: s1 [file s1]

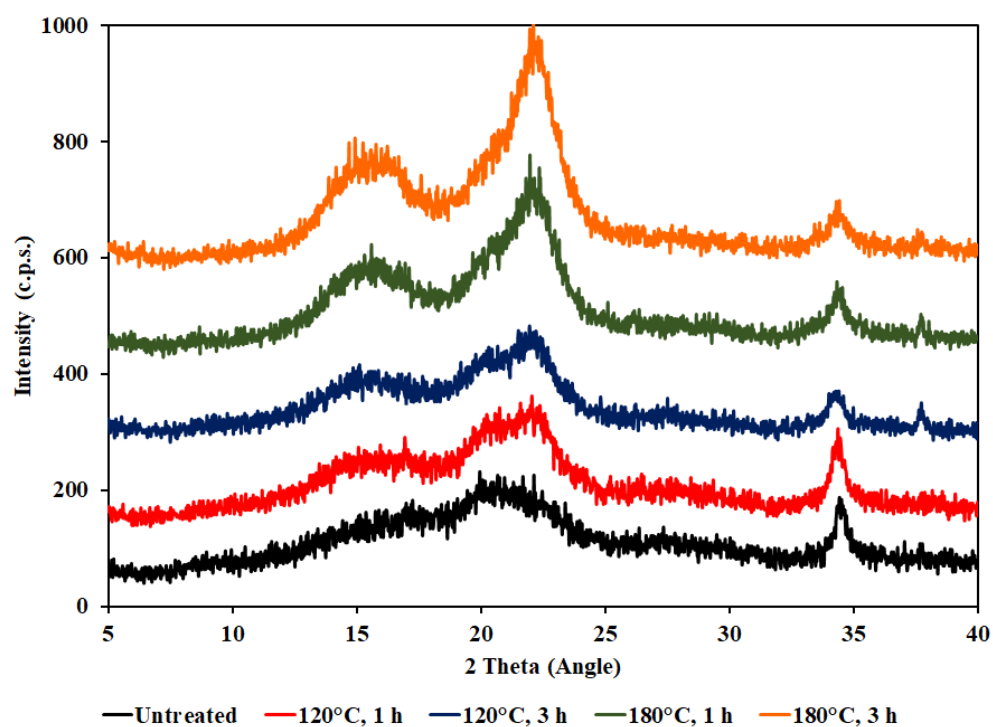

Figure S1. XRD spectra of native and imidazole pretreated samples.

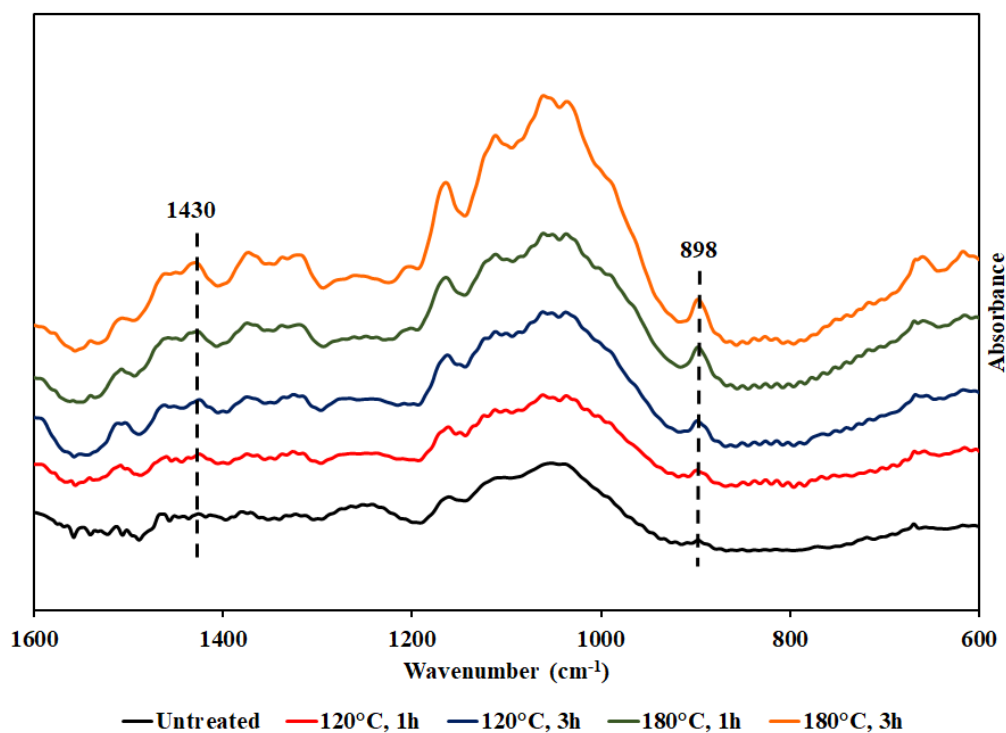

Figure S2. FTIR spectra of native and imidazole pretreated samples.
